# Supplementary material
Source: publisher figshare collection journal article supplement (https://springernature.figshare.com/ndownloader/files/22572734)
Supplement: Supplementary file 1 [file 22572734]

**Additional File 3: Features of Newspapers selected for content analysis**

**La Repubblica**

**Genre**: independent national newspaper

**Sales**: more than 600,000 copies per day

**Date of foundation**: 1976

**Location**: via Cristoforo Colombo 90 (Rome)

**Founder**: Eugenio Scalfari

**Property**: L’Espresso group

**Director**: Ezio Mauro

**Political orientation**: apparently it is an independent newspaper but in reality, it follows an ideology based on the values of the center-left.

**Il Corriere della Sera**

**Genre**: independent national newspaper

**Sales**: 700,000 copies per day

**Date of foundation**: March 5, 1876

**Location**: via Solferino 28 (Milan)

**Founder**: Eugenio Torelli Viollier

**Property**: RCS

**Director:** Paolo Mieli

**Political orientation**: it has a moderate and liberal tradition.

**La Gazzetta del Sud**

**Genre**: Sicilian national newspaper

**Sales**: 31.094

**Date of foundation**: April 13, 1952

**Location**: via Umberto Bonino, 15c (Messina)

**Founder**: Umberto Bonino

**Property**: Bonino-Pulejo foundation and Italian publishing company

**Director:** Alessandro Notarstefano

**Political orientation**: Liberal tradition.

**La Sicilia**

**Genre**: Sicilian national newspaper

**Sales**: 26525

**Date of foundation**: March 15, 1945

**Location**: Via S. Agata and via S. Maria del Rosario, Catania

**Founder:** group of Sicilian industrialists, intellectuals and politicians

**Property**:

**Director:** Antonello Pireneo and Domenico Ciancio Sanfilippo

**Political orientation**: Liberal tradition.

**Il Giornale di Sicilia**

**Genre**: Sicilian national newspaper

**Sales**: 21452

**Date of foundation**: June 7, 1860

**Location**: Via Lincoln, 19, Palermo

**Founder:** Girolamo Ardizzone

**Property**: Italian publishing company and Antonio Ardizzone

**Director:** Antonio Ardizzone

**Political orientation**: Liberal tradition.
